# Supplementary material for: Novel Positive Regulatory Role for the SPL6 Transcription Factor in the N TIR-NB-LRR Receptor-Mediated Plant Innate Immunity
Source: PubMed Central journal article supplement (PMC3597514; doi:10.1371/journal.ppat.1003235), 2013-03-14
Supplement: ppat.1003235.s005.pdf [file ppat.1003235.s005.pdf]

**Table S1.** Complete list of RPS4-induced genes that are downregulated 2 fold or more in SPL6-RNAi plants infected with Pst::avrRPS4 at 3 h or 6 h post infection

| AT#       | Annotation                                                                         | log2 fold change SPL6-RNAi-infected (3h) vs. Col-0-infected (3h) | log2 fold change SPL6-RNAi-infected (6h) vs. Col-0-infected (6h) |
|-----------|------------------------------------------------------------------------------------|------------------------------------------------------------------|------------------------------------------------------------------|
| At2g14560 | unknown protein                                                                    | -2.64                                                            | -1.25                                                            |
| At5g03350 | putative protein                                                                   | -2.54                                                            | -1.16                                                            |
| At4g17030 | allergen like protein                                                              | -2.51                                                            | -1.04                                                            |
| At1g21110 | O-methyltransferase, putative                                                      | -2.36                                                            | -0.47                                                            |
| At5g52760 | putative protein                                                                   | -2.33                                                            | -0.93                                                            |
| At2g37330 | unknown protein                                                                    | -2.14                                                            | 0.36                                                             |
| At2g20145 | Expressed protein                                                                  | -2.07                                                            | -0.81                                                            |
| At5g41040 | N-hydroxycinnamoyl/benzoyltransferase-like protein                                 | -2.06                                                            | -0.22                                                            |
| At3g52430 | putative protein                                                                   | -2.05                                                            | -1.17                                                            |
| At1g73800 | Expressed protein                                                                  | -2.03                                                            | -0.83                                                            |
| At5g53030 | putative protein                                                                   | -2.02                                                            | 0.24                                                             |
| At3g22620 | hypothetical protein                                                               | -2.02                                                            | 0.41                                                             |
| At2g14610 | pathogenesis-related PR-1-like protein                                             | -1.97                                                            | -3.46                                                            |
| At5g39670 | calcium-binding protein - like                                                     | -1.96                                                            | -0.44                                                            |
| At3g52720 | carbonic anhydrase (CAH1)                                                          | -1.90                                                            | 0.39                                                             |
| At5g55450 | unknown protein                                                                    | -1.90                                                            | -2.40                                                            |
| At3g56400 | DNA-binding protein 4 WRKY4 - Nicotiana tabacum                                    | -1.88                                                            | -0.97                                                            |
| At3g60420 | putative protein prib5                                                             | -1.86                                                            | -0.70                                                            |
| At5g47130 | putative protein contains similarity to Bax inhibitor-1                            | -1.84                                                            | -1.62                                                            |
| At5g51190 | putative protein contains similarity to ethylene responsive element binding factor | -1.80                                                            | 0.20                                                             |
| At1g43910 | unknown protein                                                                    | -1.80                                                            | -0.70                                                            |
| At5g52750 | putative protein                                                                   | -1.78                                                            | -0.34                                                            |
| At5g54610 | ankyrin-repeat-containing protein-like                                             | -1.76                                                            | -1.15                                                            |

Table S1

|           |                                                                  |       |       |
|-----------|------------------------------------------------------------------|-------|-------|
| At2g04450 | putative mutT domain protein                                     | -1.76 | -2.92 |
| At2g17040 | NAM (no apical meristem)-like protein                            | -1.74 | -0.61 |
| At3g22600 | unknown protein; lipid transfer protein family                   | -1.73 | -0.43 |
| At5g41610 | Na <sup>+</sup> /H <sup>+</sup> antiporter-like protein          | -1.68 | -0.91 |
| At3g26470 | unknown protein                                                  | -1.68 | -1.08 |
| At1g17610 | disease resistance protein, putative                             | -1.67 | -1.06 |
| At1g35210 | hypothetical protein                                             | -1.63 | -0.79 |
| At5g15800 | MADS box protein AGL2                                            | -1.61 | 0.16  |
| At1g33720 | cytochrome P450, putative                                        | -1.60 | -0.92 |
| At1g13470 | hypothetical protein                                             | -1.59 | -1.73 |
| At1g73805 | putative calmodulin-binding protein                              | -1.59 | -0.76 |
| At1g18570 | myb factor, putative                                             | -1.56 | -0.46 |
| At1g72930 | similar to flax rust resistance protein                          | -1.45 | -0.96 |
| At1g72240 | hypothetical protein                                             | -1.42 | -0.38 |
| At4g12690 | putative protein                                                 | -1.41 | -0.32 |
| At3g50930 | BCS1 protein-like protein                                        | -1.40 | -0.26 |
| At4g33100 | putative protein                                                 | -1.40 | -0.96 |
| At1g19960 | hypothetical protein                                             | -1.40 | -0.83 |
| At3g45640 | mitogen-activated protein kinase 3                               | -1.39 | -0.56 |
| At4g17490 | ethylene responsive element binding factor-like protein (AtERF6) | -1.39 | 0.38  |
| At5g04070 | putative protein                                                 | -1.38 | -0.81 |
| At3g20420 | RNA helicase, putative                                           | -1.37 | -1.16 |
| At5g58570 | Expressed protein                                                | -1.35 | -0.48 |
| At5g43910 | putative protein                                                 | -1.30 | -1.17 |
| At5g05340 | peroxidase                                                       | -1.29 | 0.27  |
| At1g74710 | isochorismate synthase (icsI)                                    | -1.29 | -0.81 |
| At5g15860 | Carboxylesterase-like                                            | -1.28 | -0.27 |
| At2g31980 | putative cysteine proteinase inhibitor B                         | -1.27 | -0.02 |

Table S1

|           |                                                 |       |       |
|-----------|-------------------------------------------------|-------|-------|
| At1g72920 | virus resistance protein, putative              | -1.26 | -0.77 |
| At3g22840 | early light-induced protein                     | -1.24 | 0.60  |
| At5g10380 | putative protein                                | -1.23 | -0.84 |
| At3g09020 | unknown protein                                 | -1.23 | -0.33 |
| At2g26190 | unknown protein                                 | -1.23 | -0.47 |
| At4g14365 | Expressed protein                               | -1.23 | -0.81 |
| At4g38560 | Phospholipase like protein                      | -1.23 | -1.54 |
| At4g12720 | growth factor like protein                      | -1.22 | -0.42 |
| At1g56520 | disease resistance protein, putative            | -1.21 | -1.21 |
| At1g72940 | disease resistance protein, putative            | -1.20 | -0.66 |
| At3g22231 | Expressed protein                               | -1.20 | -1.00 |
| At4g04490 | putative receptor-like protein kinase           | -1.18 | -1.49 |
| At4g27280 | putative protein centrin,                       | -1.17 | -0.15 |
| At4g26140 | putative beta-galactosidase                     | -1.15 | -0.82 |
| At5g66380 | putative protein                                | -1.15 | -0.11 |
| At1g68110 | hypothetical protein                            | -1.15 | -0.82 |
| At2g42890 | putative RNA-binding protein                    | -1.15 | -0.72 |
| At5g09470 | mitochondrial carrier-like protein              | -1.15 | -0.55 |
| At5g24110 | unknown protein                                 | -1.14 | -0.15 |
| At5g05460 | similarity to endo-beta-N-acetylglucosaminidase | -1.14 | -1.51 |
| At1g60040 | hypothetical protein                            | -1.14 | 1.05  |
| At3g21080 | unknown protein                                 | -1.14 | -0.90 |
| At1g62710 | beta-VPE                                        | -1.14 | -0.43 |
| At3g04630 | unknown protein                                 | -1.12 | 0.56  |
| At1g76620 | unknown protein                                 | -1.12 | -1.68 |
| At1g15790 | unknown protein                                 | -1.11 | -0.85 |
| At4g05460 | F-box protein family, AtFBL20                   | -1.11 | -0.17 |
| At1g35230 | hypothetical protein                            | -1.10 | -1.07 |
| At2g40750 | hypothetical protein                            | -1.10 | -0.20 |

Table S1

|           |                                               |       |       |
|-----------|-----------------------------------------------|-------|-------|
| At1g77760 | nitrate reductase 1 (NR1)                     | -1.10 | -0.74 |
| At4g26550 | putative protein                              | -1.08 | -0.56 |
| At5g60800 | putative protein                              | -1.08 | -0.97 |
| At1g43790 | hypothetical protein                          | -1.08 | -0.68 |
| At5g06480 | putative protein                              | -1.07 | -0.01 |
| At1g74440 | hypothetical protein                          | -1.06 | -0.92 |
| At2g32030 | putative alanine acetyl transferase           | -1.05 | 0.48  |
| At1g33960 | AIG1                                          | -1.04 | -0.87 |
| At5g61900 | copine - like protein copine I                | -1.04 | -0.88 |
| At1g24140 | putative metalloproteinase                    | -1.04 | -0.12 |
| At1g73830 | putative helix-loop-helix DNA-binding protein | -1.04 | -0.34 |
| At3g47480 | putative calcium-binding protein              | -1.04 | -0.91 |
| At3g48080 | hypothetical protein                          | -1.03 | -1.22 |
| At5g65205 | Expressed protein                             | -1.02 | -0.33 |
| At1g72890 | disease resistance protein, putative          | -1.02 | -0.73 |
| At3g17365 | Expressed protein                             | -1.01 | -1.22 |
| At2g13810 | putative aspartate aminotransferase           | -0.01 | -4.77 |
| At2g14620 | putative endoxyloglucan glycosyltransferase   | -0.03 | -4.34 |
| At1g21240 | hypothetical protein                          | -0.02 | -3.03 |
| At1g33950 | AIG1-like protein                             | -0.34 | -2.92 |
| At3g25010 | disease resistance protein, putative          | 0.01  | -2.87 |
| At3g60470 | putative protein                              | -0.01 | -2.86 |
| At5g11920 | fructosidase - like                           | -0.65 | -2.79 |
| At3g12230 | serine carboxypeptidase, putative             | -0.01 | -2.70 |
| At5g45080 | putative protein                              | 0.01  | -2.67 |
| At3g12220 | serine carboxypeptidase, putative             | -0.03 | -2.61 |
| At5g55420 | unknown protein                               | -0.01 | -2.53 |
| At1g35910 | trehalose-phosphatase, putative               | -0.02 | -2.53 |
| At5g26696 | nectarin - like protein                       | 1.04  | -2.53 |

Table S1

|           |                                                                        |       |       |
|-----------|------------------------------------------------------------------------|-------|-------|
| At3g13610 | unknown protein contains similarity to DNA-binding protein             | -0.01 | -2.53 |
| At1g04800 | unknown protein                                                        | -0.22 | -2.34 |
| At2g23170 | unknown protein                                                        | 1.27  | -2.33 |
| At4g04500 | putative receptor-like protein kinase                                  | -0.02 | -2.31 |
| At2g18660 | hypothetical protein                                                   | 0.07  | -2.24 |
| At3g28510 | hypothetical protein                                                   | 0.94  | -2.17 |
| At5g40010 | putative protein BCS1                                                  | 0.54  | -2.16 |
| At1g63340 | unknown protein contains similarity to Flavin-containing monooxygenase | -0.01 | -2.13 |
| At2g39320 | hypothetical protein                                                   | -0.04 | -2.07 |
| At5g25820 | putative protein                                                       | -0.02 | -2.05 |
| At5g41280 | putative protein                                                       | 0.72  | -2.03 |
| At4g10500 | putative Fe(II)/ascorbate oxidase SRG1 protein                         | 0.00  | -2.03 |
| At4g26270 | pyrophosphate-dependent phosphofructo-1-kinase                         | 0.09  | -2.02 |
| At1g21740 | putative bzip-like transcription factor                                | 0.00  | -2.01 |
| At4g36700 | globulin-like protein                                                  | 0.00  | -2.01 |
| At5g42830 | N-hydroxycinnamoyl benzoyltransferase-like protein                     | 0.32  | -1.96 |
| At1g17590 | transcription factor, putative                                         | -0.06 | -1.95 |
| At1g05880 | hypothetical protein                                                   | -0.04 | -1.94 |
| At2g24650 | hypothetical protein                                                   | -0.03 | -1.94 |
| At3g03700 | hypothetical protein                                                   | -0.14 | -1.93 |
| At2g04430 | putative mutT domain protein                                           | -0.33 | -1.92 |
| At5g53870 | putative protein                                                       | 0.11  | -1.91 |
| At1g59500 | auxin-regulated protein GH3, putative                                  | 0.33  | -1.91 |
| At1g17615 | disease resistance protein RPP1-WsA, putative                          | 0.00  | -1.91 |
| At4g18430 | membrane-bound small GTP-binding - like protein                        | 0.20  | -1.90 |
| At1g04490 | unknown protein                                                        | -0.74 | -1.90 |
| At5g44460 | calmodulin-like protein                                                | 0.05  | -1.89 |
| At1g21520 | hypothetical protein                                                   | 0.12  | -1.87 |

Table S1

|           |                                                                          |       |       |
|-----------|--------------------------------------------------------------------------|-------|-------|
| At5g64780 | putative protein                                                         | -0.06 | -1.85 |
| At5g52770 | unknown protein                                                          | -0.09 | -1.84 |
| At5g22570 | putative protein                                                         | 0.22  | -1.81 |
| At1g03660 | unknown unknown                                                          | 0.04  | -1.79 |
| At1g19250 | unknown protein similar to dimethylaniline monooxygenase                 | 0.24  | -1.78 |
| At5g60280 | receptor like protein kinase                                             | 0.23  | -1.77 |
| At3g59010 | pectinesterase precursor-like protein                                    | -0.11 | -1.76 |
| At5g45090 | putative protein                                                         | -0.38 | -1.74 |
| At4g29020 | glycine-rich protein like                                                | 1.05  | -1.72 |
| At4g23150 | serine/threonine kinase - like                                           | 0.26  | -1.70 |
| At1g12290 | hypothetical protein                                                     | -0.01 | -1.70 |
| At5g55170 | ubiquitin-like protein                                                   | -0.84 | -1.68 |
| At3g51330 | putative protein                                                         | 0.01  | -1.67 |
| At3g57460 | putative protein metalloendopeptidase                                    | 0.16  | -1.67 |
| At3g13090 | ABC transporter, putative                                                | 1.37  | -1.65 |
| At5g61250 | putative protein heparanase                                              | -0.40 | -1.65 |
| At3g29250 | short-chain alcohol dehydrogenase, putative                              | 0.00  | -1.64 |
| At2g46070 | putative mitogen-activated protein kinase                                | -0.98 | -1.63 |
| At4g05030 | hypothetical protein                                                     | -0.01 | -1.63 |
| At4g15190 | hypothetical protein                                                     | 0.00  | -1.62 |
| At5g24530 | flavanone 3-hydroxylase-like protein                                     | -0.94 | -1.60 |
| At5g64800 | CLE21, putative CLAVATA3/ESR-Related 21 (CLE21)                          | -0.03 | -1.60 |
| At4g36710 | SCARECROW-like protein                                                   | -0.23 | -1.59 |
| At4g16820 | triacylglycerol lipase like protein                                      | 0.06  | -1.59 |
| At1g03050 | putative protein destination factor Similar to clathrin assembly protein | 0.00  | -1.55 |
| At2g21030 | hypothetical protein                                                     | 0.10  | -1.53 |
| At1g02450 | unknown protein                                                          | -0.06 | -1.53 |
| At5g23320 | farnesyl cysteine carboxyl methyltransferase-like                        | -0.04 | -1.51 |

Table S1

|           |                                                                             |       |       |
|-----------|-----------------------------------------------------------------------------|-------|-------|
| At1g13310 | hypothetical protein                                                        | 0.67  | -1.51 |
| At4g00700 | putative phosphoribosylanthranilate transferase                             | -0.86 | -1.49 |
| At4g23030 | putative protein                                                            | 0.09  | -1.48 |
| At5g41180 | receptor kinase-like protein                                                | -0.80 | -1.48 |
| At2g15040 | putative disease resistance protein                                         | -0.27 | -1.45 |
| At4g11840 | putative phospholipase D-gamma                                              | 0.85  | -1.45 |
| At3g60520 | putative protein                                                            | -0.73 | -1.45 |
| At4g11000 | putative protein                                                            | -0.38 | -1.45 |
| At4g37010 | caltractin-like protein                                                     | -0.61 | -1.45 |
| At3g50140 | putative protein                                                            | 0.70  | -1.44 |
| At4g12910 | SERINE CARBOXYPEPTIDASE I PRECURSOR-like                                    | -0.11 | -1.44 |
| At5g44480 | putative protein                                                            | 1.38  | -1.43 |
| At3g13782 | nucleosome assembly protein, putative                                       | 0.27  | -1.43 |
| At5g51630 | putative disease resistance protein; similarity to TMV resistance protein N | 0.29  | -1.42 |
| At1g30900 | putative vacuolar sorting receptor                                          | 0.00  | -1.42 |
| At5g01610 | putative protein                                                            | 0.04  | -1.42 |
| At1g74080 | putative transcription factor                                               | -0.03 | -1.41 |
| At2g26400 | unknown protein                                                             | 0.30  | -1.41 |
| At5g02690 | putative protein                                                            | -0.52 | -1.41 |
| At5g57970 | similarity to DNA-3-methyladenine glycosylase                               | -0.33 | -1.41 |
| At5g43150 | unknown protein                                                             | -0.54 | -1.41 |
| At3g11340 | glucosyl transferase, putative                                              | 0.63  | -1.41 |
| At4g39830 | putative L-ascorbate oxidase L-ascorbate oxidase                            | -0.52 | -1.41 |
| At2g20110 | hypothetical protein                                                        | 0.09  | -1.41 |
| At3g26440 | unknown protein                                                             | 0.18  | -1.40 |
| At3g22930 | calmodulin, putative                                                        | -0.77 | -1.40 |
| At3g26430 | nodulin, putative                                                           | -0.70 | -1.39 |
| At5g09530 | periaxin - like                                                             | -0.94 | -1.39 |

Table S1

|           |                                                                  |       |       |
|-----------|------------------------------------------------------------------|-------|-------|
| At1g06770 | hypothetical protein                                             | 0.27  | -1.39 |
| At2g43570 | endochitinase isolog                                             | 0.30  | -1.39 |
| At1g67635 | hypothetical protein                                             | -0.02 | -1.39 |
| At1g17600 | disease resistance protein RPP1-WsB, putative                    | -0.71 | -1.39 |
| At4g18630 | putative protein                                                 | 0.00  | -1.39 |
| At5g52810 | putative protein contains similarity to ornithine cyclodeaminase | -0.11 | -1.37 |
| At3g54330 | putative protein                                                 | -0.04 | -1.37 |
| At5g40730 | putative protein                                                 | 0.65  | -1.37 |
| At5g50560 | putative protein                                                 | 0.93  | -1.36 |
| At5g09290 | 3'(2'),5'-bisphosphate nucleotidase-like                         | -0.07 | -1.36 |
| At1g55610 | receptor kinase, putative                                        | 0.10  | -1.36 |
| At5g18750 | putative protein                                                 | 0.58  | -1.36 |
| At3g04290 | putative GDSL-motif lipase/acylhydrolase                         | 2.09  | -1.36 |
| At5g11460 | putative protein                                                 | -0.45 | -1.34 |
| At5g46280 | MCM3 homolog                                                     | -0.03 | -1.34 |
| At2g02580 | putative cytochrome P450                                         | -0.20 | -1.32 |
| At5g45000 | putative protein                                                 | 0.68  | -1.32 |
| At5g13320 | auxin-responsive - like                                          | -0.62 | -1.32 |
| At5g40280 | beta subunit of protein farnesyl transferase                     | -0.41 | -1.31 |
| At3g57240 | beta-1,3-glucanase                                               | -0.12 | -1.30 |
| At3g14470 | disease resistance protein, putative                             | -0.57 | -1.30 |
| At1g76760 | thioredoxin-like protein                                         | 0.33  | -1.30 |
| At5g58940 | receptor-like protein kinase                                     | -0.66 | -1.30 |
| At2g03410 | unknown protein                                                  | 0.88  | -1.28 |
| At2g16440 | putative CDC21 protein                                           | 0.01  | -1.27 |
| At5g56970 | cytokinin oxidase                                                | 0.62  | -1.27 |
| At3g51750 | hypothetical protein                                             | -0.91 | -1.27 |
| At4g30900 | hypothetical protein                                             | 0.14  | -1.26 |
| At5g39190 | germin-like protein (GLP2a)                                      | -0.34 | -1.25 |



Table S1

|           |                                                     |       |       |
|-----------|-----------------------------------------------------|-------|-------|
| At3g61390 | putative protein                                    | 0.46  | -1.25 |
| At1g55780 | hypothetical protein                                | 0.00  | -1.23 |
| At5g01970 | putative protein                                    | 0.01  | -1.22 |
| At3g60110 | putative protein                                    | 0.10  | -1.22 |
| At4g26120 | NPR1 like protein                                   | -0.97 | -1.22 |
| At4g15200 | p140mDia like protein                               | 0.00  | -1.22 |
| At5g51380 | putative protein                                    | -0.38 | -1.22 |
| At1g51640 | hypothetical protein                                | -0.14 | -1.22 |
| At2g25000 | putative WRKY-type DNA binding protein              | -0.91 | -1.21 |
| At1g33800 | hypothetical protein                                | 0.00  | -1.21 |
| At1g14870 | unknown protein                                     | 0.63  | -1.21 |
| At1g10340 | hypothetical protein                                | -0.81 | -1.19 |
| At1g21140 | tonoplast intrinsic protein, alpha (alpha-TIP)      | 0.24  | -1.19 |
| At3g02770 | putative S-adenosylmethionine:2-demethylmenaquinone | -0.68 | -1.19 |
| At1g07000 | leucine zipper protein, putative                    | -0.15 | -1.19 |
| At5g26731 | Expressed protein                                   | 0.00  | -1.19 |
| At3g26830 | putative cytochrome P450                            | 1.89  | -1.19 |
| At4g14630 | germin precursor oxalate oxidase                    | 0.02  | -1.18 |
| At1g02740 | unknown protein                                     | -0.30 | -1.18 |
| At2g31990 | hypothetical protein                                | 0.21  | -1.18 |
| At3g28580 | hypothetical protein                                | -0.80 | -1.17 |
| At4g00234 | predicted protein                                   | 0.01  | -1.17 |
| At4g32870 | putative protein                                    | 0.81  | -1.16 |
| At4g33925 | Expressed protein                                   | -0.04 | -1.16 |
| At5g19580 | putative protein glyoxal oxidase precursor          | -0.86 | -1.16 |
| At5g17760 | BCS1 - like protein                                 | -0.09 | -1.15 |
| At3g16700 | putative decarboxilase                              | -0.02 | -1.15 |
| At2g34500 | putative cytochrome P450                            | 1.83  | -1.15 |
| At1g61490 | receptor kinase, putative                           | 0.44  | -1.15 |

Table S1

|           |                                                                  |       |       |
|-----------|------------------------------------------------------------------|-------|-------|
| At2g16870 | putative disease resistance protein                              | -0.04 | -1.15 |
| At3g11040 | unknown protein                                                  | 0.00  | -1.14 |
| At3g15390 | hypothetical protein                                             | -0.02 | -1.14 |
| At3g48490 | hypothetical protein                                             | 0.60  | -1.14 |
| At5g52720 | putative protein                                                 | -0.79 | -1.13 |
| At5g64530 | similarity to NAM (no apical meristem)                           | -0.58 | -1.13 |
| At3g52480 | putative protein                                                 | -0.20 | -1.12 |
| At5g15870 | putative protein beta-glucan-elicitor receptor                   | -0.39 | -1.12 |
| At1g24090 | unknown protein                                                  | -0.17 | -1.12 |
| At1g65610 | endo-1,4-beta-glucanase, putative                                | 0.32  | -1.12 |
| At5g62770 | putative protein                                                 | -0.07 | -1.11 |
| At3g57950 | putative protein                                                 | -0.02 | -1.11 |
| At1g03055 | Expressed protein                                                | 0.00  | -1.11 |
| At2g16835 | putative plasma membrane intrinsic protein                       | 0.38  | -1.11 |
| At1g01340 | cyclic nucleotide and calmodulin-regulated ion channel, putative | -0.09 | -1.09 |
| At5g16310 | ubiquitin C-terminal hydrolase-like                              | -0.54 | -1.09 |
| At4g00850 | coded for by <i>A. thaliana</i> cDNA                             | -0.42 | -1.09 |
| At4g08110 | predicted protein of unknown function                            | -0.40 | -1.09 |
| At3g45260 | zinc finger protein                                              | -0.90 | -1.09 |
| At2g26440 | putative pectinesterase                                          | -0.50 | -1.09 |
| At5g56340 | putative protein                                                 | 0.06  | -1.08 |
| At1g08180 | hypothetical protein                                             | -0.62 | -1.08 |
| At1g69526 | Expressed protein                                                | -0.57 | -1.07 |
| At5g11870 | putative protein                                                 | 0.64  | -1.07 |
| At4g16850 | hypothetical protein                                             | 0.00  | -1.07 |
| At3g57100 | putative protein                                                 | 0.00  | -1.07 |
| At1g78550 | flavanone 3-hydroxylase, putative                                | -0.04 | -1.07 |
| At2g40550 | hypothetical protein                                             | 0.68  | -1.06 |

Table S1

|           |                                                                                   |       |       |
|-----------|-----------------------------------------------------------------------------------|-------|-------|
| At5g46230 | unknown protein                                                                   | -0.18 | -1.06 |
| At2g46000 | unknown protein                                                                   | -0.02 | -1.06 |
| At1g72730 | putative Eukaryotic initiation factor 4A                                          | -0.25 | -1.06 |
| At5g06750 | protein phosphatase 2C-like                                                       | -0.26 | -1.06 |
| At4g11170 | RPP1-WsA-like disease resistance protein                                          | -0.06 | -1.05 |
| At2g22570 | unknown protein                                                                   | -0.01 | -1.05 |
| At1g31540 | similar to downy mildew resistance protein RPP5 [Arabidopsis thaliana] GI:6449046 | 0.32  | -1.05 |
| At5g62180 | putative protein PrMC3                                                            | 0.30  | -1.05 |
| At4g21610 | Lsd1 like protein zinc-finger protein                                             | -0.04 | -1.05 |
| At4g19050 | putative protein                                                                  | -0.02 | -1.05 |
| At2g02930 | putative glutathione S-transferase                                                | 0.26  | -1.04 |
| At1g03850 | hypothetical protein                                                              | 1.97  | -1.04 |
| At5g56610 | putative protein                                                                  | -0.18 | -1.04 |
| At3g17700 | hypothetical protein                                                              | -0.51 | -1.04 |
| At5g45490 | putative protein                                                                  | -0.33 | -1.04 |
| At1g57650 | disease resistance protein RPP1-WsA, putative                                     | 0.22  | -1.04 |
| At4g03450 | hypothetical protein                                                              | -0.99 | -1.04 |
| At5g60930 | microtubule-associated motor - like                                               | 0.04  | -1.03 |
| At2g29400 | phosphoprotein phosphatase, type 1 catalytic subunit                              | -0.04 | -1.03 |
| At4g36550 | putative protein                                                                  | -0.62 | -1.03 |
| At3g53150 | glucosyltransferase - like protein                                                | 0.14  | -1.03 |
| At2g16595 | putative TRAP protein                                                             | -0.01 | -1.03 |
| At1g56540 | disease resistance protein, putative                                              | 0.39  | -1.03 |
| At5g46520 | disease resistance protein-like                                                   | -0.12 | -1.03 |
| At3g14060 | expressed protein                                                                 | -0.88 | -1.02 |
| At3g17420 | serine/threonine protein kinase, putative                                         | -0.06 | -1.02 |
| At1g61260 | cotton fiber expressed protein, putative                                          | -0.57 | -1.02 |
| At5g58980 | random slug protein - like                                                        | 0.26  | -1.02 |

Table S1

|           |                                                 |       |       |
|-----------|-------------------------------------------------|-------|-------|
| At4g23610 | hypothetical protein                            | -0.31 | -1.01 |
| At1g75130 | cytochrome P450, putative                       | -0.46 | -1.01 |
| At3g14700 | hypothetical protein                            | 0.54  | -1.01 |
| At3g61580 | delta-8 sphingolipid desaturase                 | 0.05  | -1.01 |
| At3g59470 | putative protein                                | 0.44  | -1.01 |
| At3g26840 | unknown protein                                 | -0.47 | -1.01 |
| At5g46960 | unknown protein                                 | 0.00  | -1.01 |
| At3g48640 | hypothetical protein                            | -0.86 | -1.01 |
| At2g44940 | putative AP2 domain transcription factor        | -0.13 | -1.00 |
| At4g02220 | putative zinc finger protein                    | -0.29 | -1.00 |
| At5g55130 | molybdopterin synthase sulphurylase             | 0.15  | -1.00 |
| At3g14840 | receptor-like serine/threonine kinase, putative | -0.24 | -1.00 |
| At1g65870 | dirigent protein, putative                      | -0.63 | -1.00 |
| At1g48320 | hypothetical protein                            | -0.71 | -1.00 |
| At4g01680 | putative transcription factor                   | 0.40  | -1.00 |
