# Supplementary material for: Novel Positive Regulatory Role for the SPL6 Transcription Factor in the N TIR-NB-LRR Receptor-Mediated Plant Innate Immunity
Source: PubMed Central journal article supplement (PMC3597514; doi:10.1371/journal.ppat.1003235), 2013-03-14
Supplement: ppat.1003235.s006.pdf [file ppat.1003235.s006.pdf]

**Table S2. Primers used for Quantitative-PCR and Semi quantitative RT-PCR**

| <b>Gene</b>                               | <b>Forward primer (5' – 3')</b> | <b>Reverse primer (5' – 3')</b> |
|-------------------------------------------|---------------------------------|---------------------------------|
| <i>NbSPL6</i>                             | GCGAAGATATACTCGGCAGT            | AAAGGCATGGTTAGTTGAGG            |
| <i>NbSPL6<sub>like</sub></i>              | ACCCTTTTTGTGATGTGAT             | GGACTACTGGCTGCTGATTT            |
| <i>NbEF1<math>\alpha</math></i>           | GGTCTACCAACCTTGACTGG            | GACGTAGGGGTTTGTCTGAG            |
| <i>NbEF1<math>\alpha</math></i> (sRT-PCR) | GCTAGGTATGATGAAATCGTGAA         | TCAACAGATTTAACTTCAGTTGT         |
| <i>AtNUDT5</i>                            | CCTGCCAATGCGTCTCATC             | TTGTCTTAATACCAGTTTCTTCTCC       |
| <i>AtFMO1</i>                             | TTGTCTTAATACCAGTTTCTTCTCC       | CTACGGCACGCAGAAGAG              |
| <i>AtPRI</i>                              | CTCCCTCGAAAGCTCAAGATAGCCCA      | CCTCTTAGTTGTTCTGCGTAGCTCCGA     |
| <i>At2g20145</i>                          | AAGTTTCAGGAGCAAAGACACTCGTG      | GCTGGTAGTTTCGTCATACAAGAAGG      |
| <i>At2g14620</i>                          | GTACAGGCGAGTCTATGG              | AAGCGTCTATCTTGTAATCC            |
| <i>AtALD1</i>                             | TTCCATCGTATTGTGACCACTTCC        | GTTGTTACCGACCGTATCTCC           |
| <i>AtWAK3</i>                             | TGTAATCATAATCGGCGTCTTGG         | AACCCTGCTCCTGAAAGTCG            |
| <i>At3g28510</i>                          | ATTGATTGCTCGCTTGATCTTACG        | ACCTTGCTCTGCTTATCATCTACC        |
| <i>At3g22620</i>                          | TTCGTGGTCAACAACAACCTCTAAGC      | GAAGTTCCATTGCTGCTACTGTTGG       |
| <i>AtUBQ</i>                              | TCACCGAAAGACAATCACCTCGAG        | TCTAGCTGCTTGCCGGCGAAAATAAG      |
| <i>AtSPL6</i> (sRT-PCR)                   | ATGGATTCTTGGAGCTACGGGAGAAG      | AGATGGCAGAGCAAAACCTCTAGAG       |
| <i>AtEF1<math>\alpha</math></i> (sRT-PCR) | GTGAGCACGCTCTTCTTGCT            | TCCTTGACAGCAACATTATT            |
| TMV repl. (sRT-PCR)                       | TTGTCATGAGCACTTCTTCGGTT         | TTTCTCTAGATCTCTAATGATAC         |
